# Supplementary material
Source: PubMed Central journal article supplement (PMC165836)
Supplement: pnas_1037608100_1.pdf [file pnas_1037608100_1.pdf]

**Table 3.** Plasmids used in this study and proteins they encode

| Plasmid        | Plasmid-encoded protein                       | Source/ref.* |
|----------------|-----------------------------------------------|--------------|
| pMS604         | LexADBD(WT) <sup>†</sup> -Fos leu zipper      | 1            |
| pDP804         | LexADBD (mutant) <sup>‡</sup> -Jun leu zipper | 1            |
| pLL1           | LexADBD (mutant)                              |              |
| pLL3           | LexADBD (WT)                                  |              |
| pLL1-G         | LexADBD (mutant)-BglG(WT)                     |              |
| pLL3-G         | LexADBD (WT)-BglG(WT)                         |              |
| pLL1-G(H208R)  | LexADBD (mutant)-BglG(H208R)                  |              |
| pLL1-G(H160Y)  | LexADBD (mutant)-BglG(H160Y)                  |              |
| pLL1-G(D100N)  | LexADBD (mutant)-BglG(D100N)                  |              |
| pLL3-G(H208R)  | LexADBD (WT)-BglG(H208R)                      |              |
| pLL3-G(H160Y)  | LexADBD (WT)-BglG(H160Y)                      |              |
| pLL3-G(D100N)  | LexADBD (WT)-BglG(D100N)                      |              |
| pLL3-IIB       | LexADBD (WT)-IIB <sup>bgl</sup> (WT)          |              |
| pLL3-IIB(C24S) | LexADBD (WT)-IIB <sup>bgl</sup> (C24S)        |              |
| pLL1-F         | LexADBD (mutant)-BglF(WT)                     |              |
| pLL1-F(C24S)   | LexADBD (mutant)-BglF(C24S)                   |              |
| PANSHF         | His <sub>6</sub> -BglF (WT)                   |              |
| pANSHF(C24S)   | His <sub>6</sub> -BglF(C24S)                  |              |
| PANSHIIB       | His <sub>6</sub> -IIB <sup>bgl</sup> (WT)     |              |
| PANSHIIB(C24S) | His <sub>6</sub> -IIB <sup>bgl</sup> (C24S)   |              |
| PLFHG          | His <sub>6</sub> -BglG (WT)                   | L. Fux       |
| pANSHG(H208R)  | His <sub>6</sub> -BglG(H208R)                 |              |
| pANSHG(H160Y)  | His <sub>6</sub> -BglG(H160Y)                 |              |
| pANSHG(D100N)  | His <sub>6</sub> -BglG(D100N)                 |              |
| PANSMG         | MBP-BglG(WT)                                  |              |
| PANSMG(H208R)  | MBP-BglG(H208R)                               |              |
| PANSMG(H160Y)  | MBP-BglG(H160Y)                               |              |
| PANSMG(D100N)  | MBP-BglG(D100N)                               |              |
| pBAD18F        | BglF (WT)                                     |              |
| pBAD18F(C24S)  | BglF(C24S)                                    |              |
| pBAD18IIB      | IIB <sup>bgl</sup> (WT)                       |              |
| pJS185         | BglG- GFP (WT)                                | J. Singh     |

\*Plasmids for which no reference has been cited were constructed as part of this work.

<sup>†</sup>LexADBD(WT) is a fragment of wild-type LexA repressor (amino acids 1-87), which contains a domain that binds to WT LexA operator.

<sup>‡</sup>LexADBD(mutant) is a fragment of LexA 408 repressor (amino acids 1-87), which contains a domain that binds to an altered LexA operator (op 45).
